# Supplementary material for: “Effectiveness of COVID-19 Vaccines in preventing Infectiousness, Hospitalization and Mortality: A Historical Cohort Study Using Iranian Registration Data During Vaccination program”
Source: bioRxiv or medRxiv preprint supplement (doi:10.1101/2022.01.18.22269330), 2022-01-21
Supplement: Supplementary file [file media-1.pdf]

**Supplementary table 1.** Frequency of events regarding COVID-19 infection, hospitalization and death in the historical cohorts of fully vaccinated and unvaccinated people

| Vaccine                   | Infection<br>[Positive RT-PCR] | Hospitalization<br>[suspicious/definite*] | Hospitalization<br>[definite] | Death<br>[suspicious/definite] | Death<br>[definite] |
|---------------------------|--------------------------------|-------------------------------------------|-------------------------------|--------------------------------|---------------------|
| BIBP-CorV                 | 6,918                          | 3,835                                     | 2,534                         | 294                            | 225                 |
| ChAdOx1-S/nCoV-19         | 1,158                          | 633                                       | 367                           | 32                             | 20                  |
| rAd26-rAd5                | 181                            | 109                                       | 63                            | 1                              | 0                   |
| BIV1-CovIran              | 482                            | 221                                       | 133                           | 5                              | 3                   |
| Unvaccinated <sup>†</sup> | 42,528                         | 17,005                                    | 10,890                        | 2,394                          | 1,931               |

\* Suspicious = Negative RT-PCR but clinically in favor of COVID-19 infection; Definite = Positive RT-PCR and clinically in favor of COVID-19 infection.

<sup>†</sup> Frequencies of the unvaccinated cohort for ChAdOx1-S/nCoV-19 vaccine were 32,702, 13,384, 8,564, 1,314, and 1,049, respectively.

Abbreviations: RT-PCR = reverse transcription–polymerase chain reaction.

**Supplementary table 2.** Age-specific frequency of events regarding COVID-19 infection, hospitalization and death in the historical cohorts of fully vaccinated and unvaccinated people

| Vaccine           | Infection<br>[Positive RT-PCR] | Hospitalization<br>[suspicious/definite*] | Hospitalization<br>[definite] | Death<br>[suspicious/definite] | Death<br>[definite] |
|-------------------|--------------------------------|-------------------------------------------|-------------------------------|--------------------------------|---------------------|
| BIBP-CorV         |                                |                                           |                               |                                |                     |
| 18-44 y           | 1,714                          | 279                                       | 259                           | 12                             | 11                  |
| 45-64 y           | 2,540                          | 987                                       | 733                           | 45                             | 28                  |
| >64 y             | 2,664                          | 2,089                                     | 1,542                         | 237                            | 186                 |
| ChAdOx1-S/nCoV-19 |                                |                                           |                               |                                |                     |
| 18-44 y           | 287                            | 25                                        | 14                            | 0                              | 0                   |
| 45-64 y           | 158                            | 49                                        | 29                            | 1                              | 1                   |
| >64 y             | 713                            | 559                                       | 324                           | 31                             | 19                  |
| rAd26-rAd5        |                                |                                           |                               |                                |                     |
| 18-44 y           | 128                            | 57                                        | 35                            | 0                              | 0                   |
| 45-64 y           | 49                             | 37                                        | 21                            | 1                              | 0                   |
| >64 y             | 4                              | 15                                        | 7                             | 0                              | 0                   |
| BIV1-CovIran      |                                |                                           |                               |                                |                     |
| 18-44 y           | 131                            | 26                                        | 12                            | 0                              | 0                   |
| 45-64 y           | 291                            | 146                                       | 94                            | 3                              | 2                   |
| >64 y             | 60                             | 49                                        | 27                            | 2                              | 1                   |
| Unvaccinated      |                                |                                           |                               |                                |                     |
| 18-44 y           | 30,461                         | 8,078                                     | 5,179                         | 295                            | 241                 |
| 45-64 y           | 9,190                          | 5,361                                     | 3,541                         | 797                            | 658                 |
| >64 y             | 2,877                          | 3,566                                     | 2,170                         | 1,302                          | 1,032               |

\* Suspicious = Negative RT-PCR but clinically in favor of COVID-19 infection; Definite = Positive RT-PCR and clinically in favor of COVID-19 infection.

<sup>†</sup> Frequencies of the unvaccinated cohort for ChAdOx1-S/nCoV-19 vaccine were 23,936, 7,024, 4,551, 225, and 187, respectively.

<sup>‡</sup> Frequencies of the unvaccinated cohort for ChAdOx1-S/nCoV-19 vaccine were 7,230, 4,401, 2,919, 524, and 436, respectively.

<sup>§</sup> Frequencies of the unvaccinated cohort for ChAdOx1-S/nCoV-19 vaccine were 1,536, 1,959, 1,093, 565, and 426, respectively.

Abbreviations: RT-PCR = reverse transcription–polymerase chain reaction.

**Supplementary table 3.** Age-specific incidence density per 100,000 persons-day regarding COVID-19 infection, hospitalization and death in the historical cohorts of fully vaccinated and unvaccinated people

| Vaccine                  | Infection<br>[Positive RT-PCR] | Hospitalization<br>[suspicious/definite *] | Hospitalization<br>[definite] | Death<br>[suspicious/definite] | Death<br>[definite] |
|--------------------------|--------------------------------|--------------------------------------------|-------------------------------|--------------------------------|---------------------|
| <b>BIBP-CorV</b>         |                                |                                            |                               |                                |                     |
| 18-44 y                  | 3.26 [3.11-3.42] <sup>#</sup>  | 0.53 [0.47-0.59]                           | 0.49 [0.43-0.55]              | 0.02 [0.12-0.39]               | 0.02 [0.01-0.04]    |
| 45-64 y                  | 3.09 [2.97-3.21]               | 1.20 [1.12-1.27]                           | 0.89 [0.82-0.95]              | 0.05 [0.04-0.07]               | 0.03 [0.03-0.05]    |
| >64 y                    | 8.02 [7.72-8.33]               | 6.28 [6.01-6.55]                           | 4.62 [4.39-4.85]              | 0.70 [0.62-0.80]               | 0.55 [0.48-0.64]    |
| <b>ChAdOx1-S/nCoV-19</b> |                                |                                            |                               |                                |                     |
| 18-44 y                  | 5.95 [5.29-6.67]               | 0.51 [0.34-0.74]                           | 0.29 [0.16-0.47]              | 0 [-] <sup>‡</sup>             | 0 [-]               |
| 45-64 y                  | 2.67 [2.28-3.11]               | 0.83 [0.62-1.08]                           | 0.49 [0.33-0.69]              | 0.02 [0.00-0.10]               | 0.02 [0.00-0.08]    |
| >64 y                    | 3.18 [2.95-3.42]               | 2.49 [2.29-2.70]                           | 1.44 [1.29-1.60]              | 0.14 [0.09-0.19]               | 0.08 [0.05-0.13]    |
| <b>rAd26-rAd5</b>        |                                |                                            |                               |                                |                     |
| 18-44 y                  | 5.41 [4.53-6.42]               | 2.30 [1.76-2.96]                           | 1.41 [1.00-1.94]              | 0 [-]                          | 0 [-]               |
| 45-64 y                  | 5.03 [3.76-6.59]               | 3.71 [2.65-5.06]                           | 2.10 [1.33-3.15]              | 0.10 [0.00-0.5]                | 0 [-]               |
| >64 y                    | 2.68 [0.85-6.46]               | 10.03 [5.83-16.17]                         | 4.64 [2.03-9.17]              | 0 [-]                          | 0 [-]               |
| <b>BIV1-CovIran</b>      |                                |                                            |                               |                                |                     |
| 18-44 y                  | 2.18 [1.83-2.58]               | 0.43 [0.29-0.62]                           | 0.20 [0.11-0.34]              | 0 [-]                          | 0 [-]               |
| 45-64 y                  | 2.72 [2.42-3.05]               | 1.36 [1.15-1.60]                           | 0.86 [0.71-1.07]              | 0.03 [0.00-0.01]               | 0.02 [0.00-0.05]    |
| >64 y                    | 3.73 [2.88-4.77]               | 3.04 [2.28-3.99]                           | 1.67 [1.13-2.40]              | 0.12 [0.02-0.41]               | 0.06 [0.00-0.30]    |
| <b>Unvaccinated</b>      |                                |                                            |                               |                                |                     |
| 18-44 y <sup>†</sup>     | 21.18 [20.94-21.42]            | 5.53 [5.41-5.66]                           | 3.54 [3.45-3.64]              | 0.20 [0.18-0.23]               | 0.16 [0.14-0.19]    |
| 45-64 y <sup>‡</sup>     | 23.06 [22.59-23.53]            | 13.32 [12.96-13.68]                        | 8.76 [8.48-9.05]              | 1.96 [1.83-2.10]               | 1.62 [1.50-1.75]    |
| >64 y <sup>§</sup>       | 11.32 [10.91-11.73]            | 14.07 [13.62-14.54]                        | 8.51 [8.16-8.87]              | 5.08 [4.81-5.37]               | 4.02 [3.76-4.28]    |

\* Suspicious = Negative RT-PCR but clinically in favor of COVID-19 infection; Definite = Positive RT-PCR and clinically in favor of COVID-19 infection.

<sup>†</sup> Incidence densities of the unvaccinated cohort for ChAdOx1-S/nCoV-19 vaccine were 23.38 [23.09-23.68], 6.79 [6.63-6.95], 4.39 [4.26-4.52], 0.22 [0.19-0.25], and 0.18 [0.15-0.21], respectively.

<sup>‡</sup> Incidence densities of the unvaccinated cohort for ChAdOx1-S/nCoV-19 vaccine were 25.48 [24.90-26.08], 15.40 [14.95-15.86], 10.18 [9.82-10.56], 1.82 [1.67-1.98], and 1.51 [1.37-1.66], respectively.

<sup>§</sup> Incidence densities of the unvaccinated cohort for ChAdOx1-S/nCoV-19 vaccine were 8.45 [8.04-8.89], 10.80 [10.33-11.29], 6.01 [5.66-6.37], 3.10 [2.85-3.36], and 2.33 [2.12-2.56], respectively.

<sup>#</sup> 95% confidence interval

<sup>‡</sup> No mortality reported

Abbreviations: RT-PCR = reverse transcription–polymerase chain reaction.
