# Supplementary material for: “Effectiveness of COVID-19 Vaccines in preventing Infectiousness, Hospitalization and Mortality: A Historical Cohort Study Using Iranian Registration Data During Vaccination program”
Source: bioRxiv or medRxiv preprint supplement (doi:10.1101/2022.01.18.22269330), 2022-01-21
Supplement: Supplementary file [file media-2.pdf]

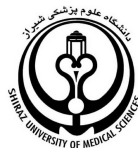

Shiraz University of Medical Sciences

### Research Ethics Committees Certificate

|                         |                                                                                                                                                                                                                                                                                                                                                                                                                                                                                                                                                                                                                                           |                |            |
|-------------------------|-------------------------------------------------------------------------------------------------------------------------------------------------------------------------------------------------------------------------------------------------------------------------------------------------------------------------------------------------------------------------------------------------------------------------------------------------------------------------------------------------------------------------------------------------------------------------------------------------------------------------------------------|----------------|------------|
| Approval ID:            | IR.SUMS.REC.1400.486                                                                                                                                                                                                                                                                                                                                                                                                                                                                                                                                                                                                                      | Approval Date: | 2021-09-15 |
| Evaluated by:           | Research Ethics Committees of Shiraz University of Medical Sciences                                                                                                                                                                                                                                                                                                                                                                                                                                                                                                                                                                       |                |            |
| Status:                 | Approved                                                                                                                                                                                                                                                                                                                                                                                                                                                                                                                                                                                                                                  |                |            |
| Approval Statement:     | <p>The project was found to be in accordance to the ethical principles and the national norms and standards for conducting Medical Research in Iran.</p> <p>Notice:</p> <ol style="list-style-type: none"><li>1. Although the proposal has been approved by the Biomedical Research Ethics Committee, meeting the professional and legal requirements is the sole responsibility of the PI and other project collaborators.</li><li>2. This certificate is reliant on the proposal/documents received by this committee on 2021-09-15. The committee must be notified by the PI as soon as the proposal/documents are modified.</li></ol> |                |            |
| Proposal Title:         | SARS-CoV-2 vaccines effectiveness against COVID-19 infection, hospitalization and mortality in a real-world setting test negative case-control study                                                                                                                                                                                                                                                                                                                                                                                                                                                                                      |                |            |
| Principal Investigator: | Name: Mohsen Moghadami<br>Email: moghadami@sums.ac.ir                                                                                                                                                                                                                                                                                                                                                                                                                                                                                                                                                                                     |                |            |

  
Dr. Mehrzad Lotfi  
Committee Director

Shiraz University of Medical Sciences

  
Dr. Abbas Rezaianzadeh  
Committee Secretary  
Shiraz University of Medical Sciences
